# Supplementary material for: Automatic Detection and Dynamic Analysis of Urban Heat Islands Based on Landsat Images
Source: MDPI journal article supplement (doi:10.3390/rs15164006), 2023-08-12
Supplement: s1 [file s1]

**Supplementary Table S2. all urban heat island extraction results**

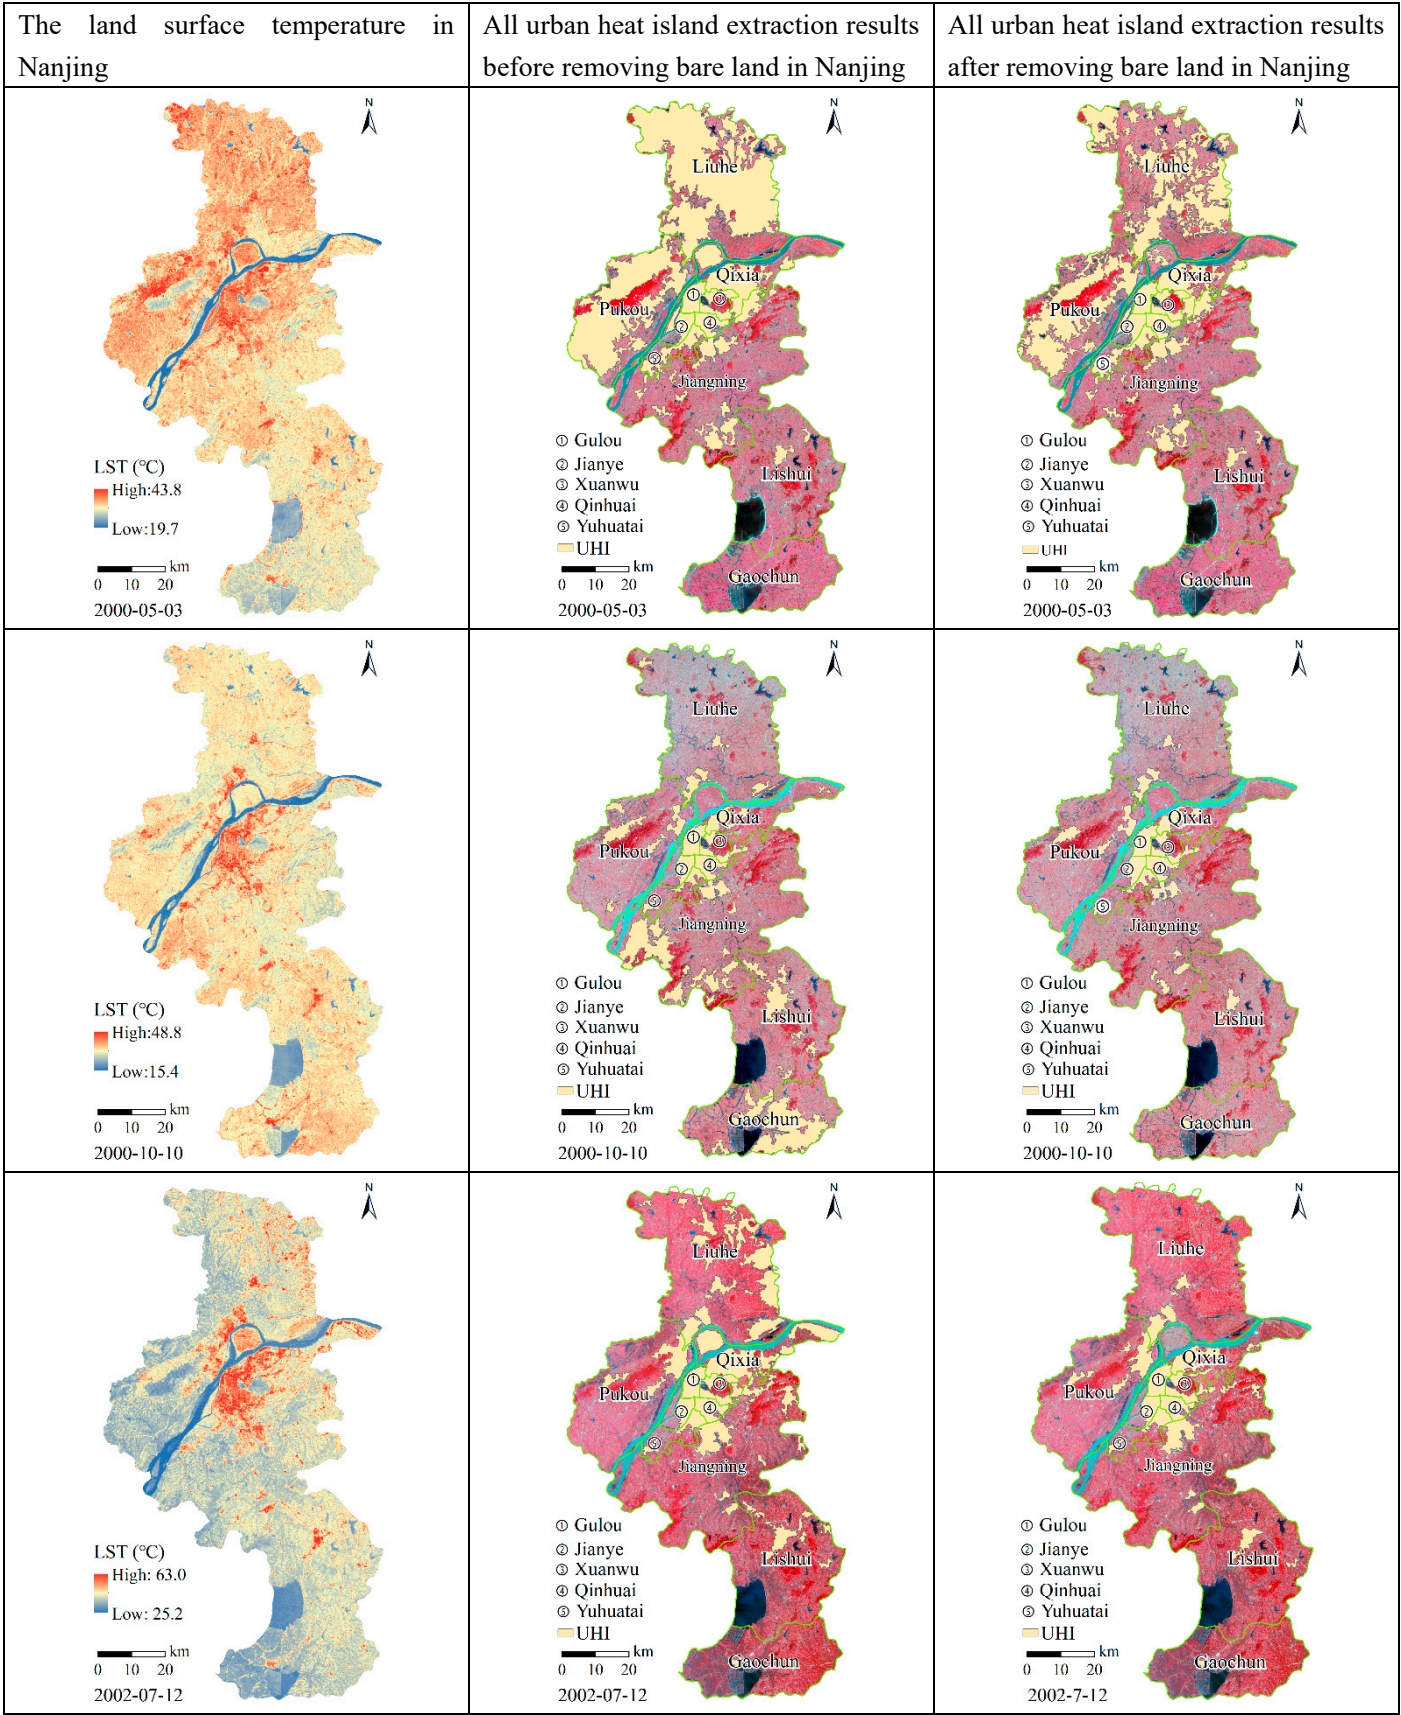

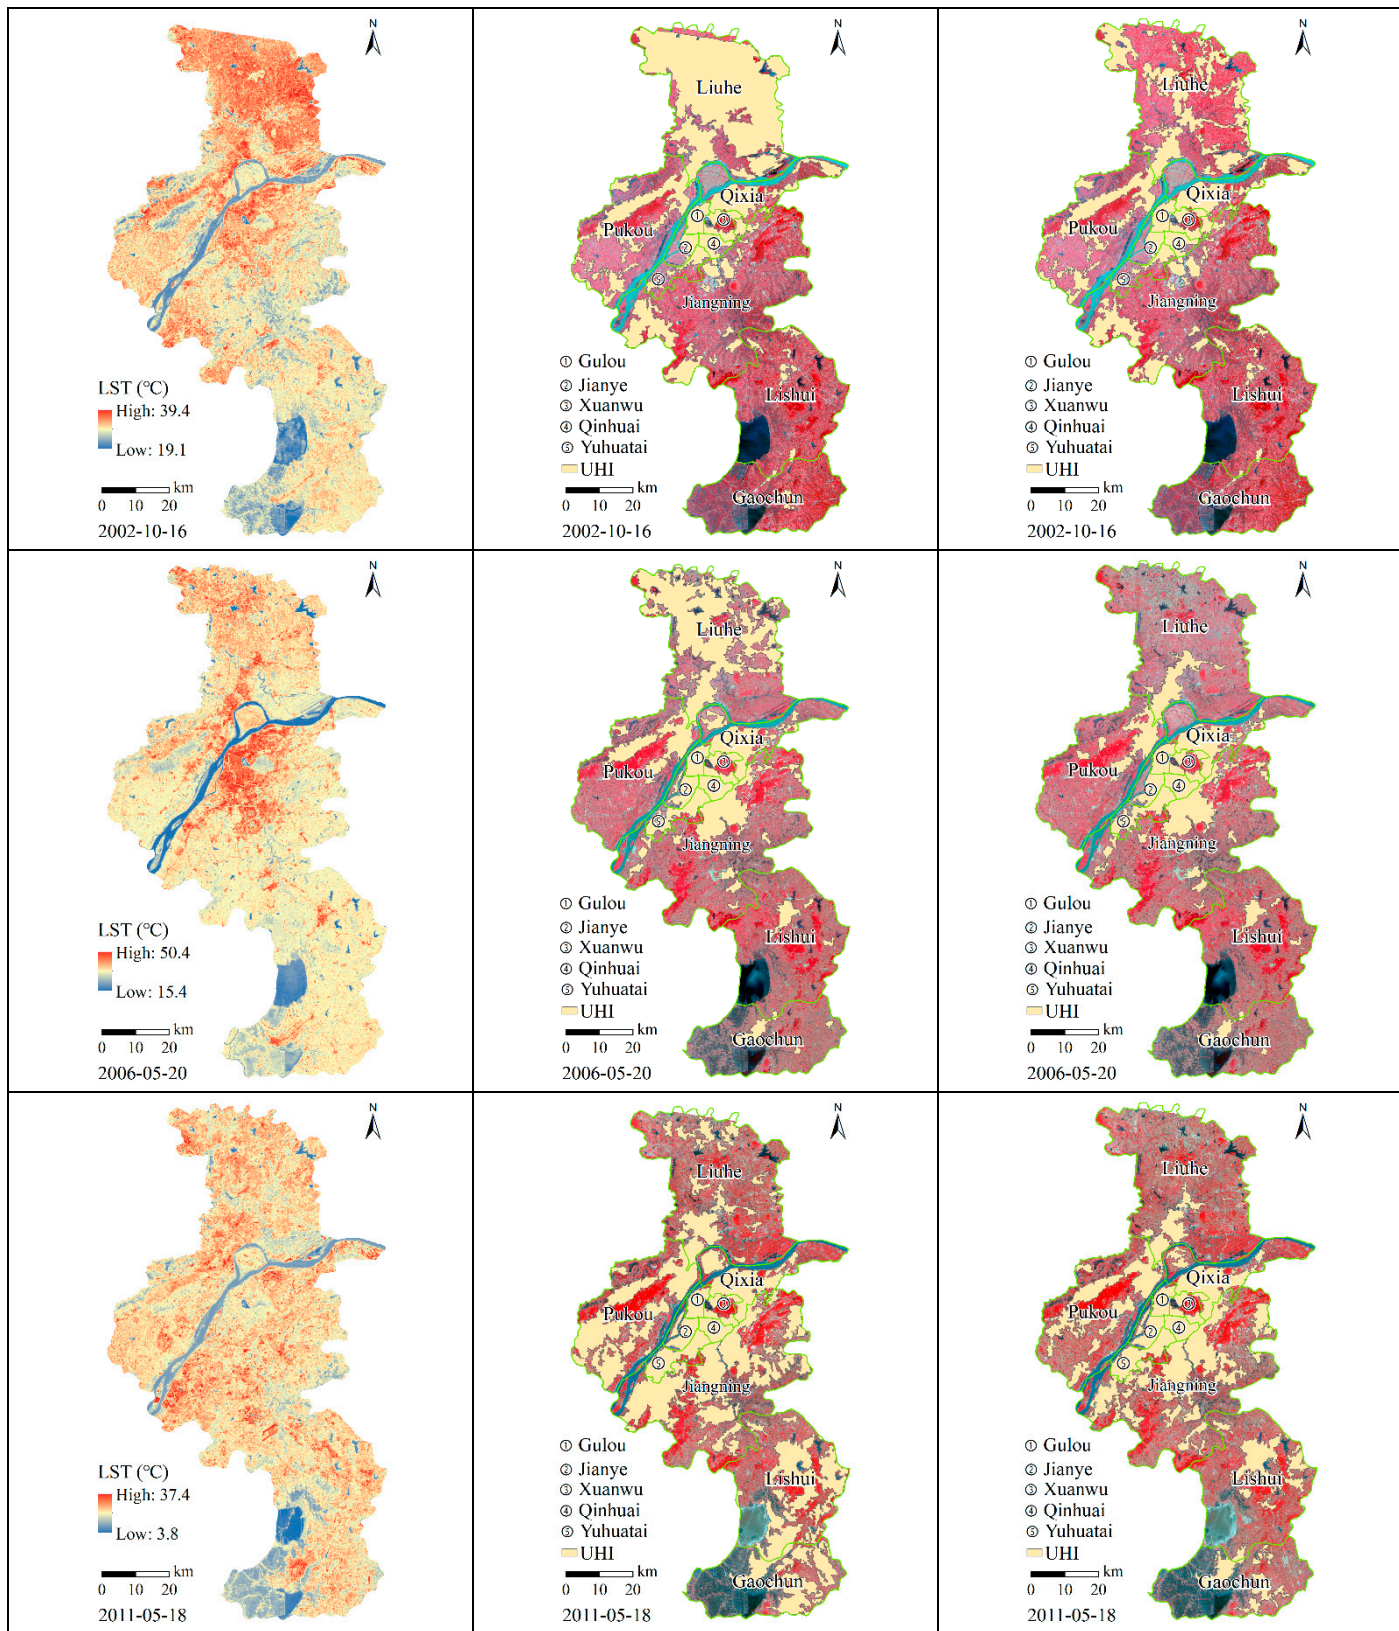



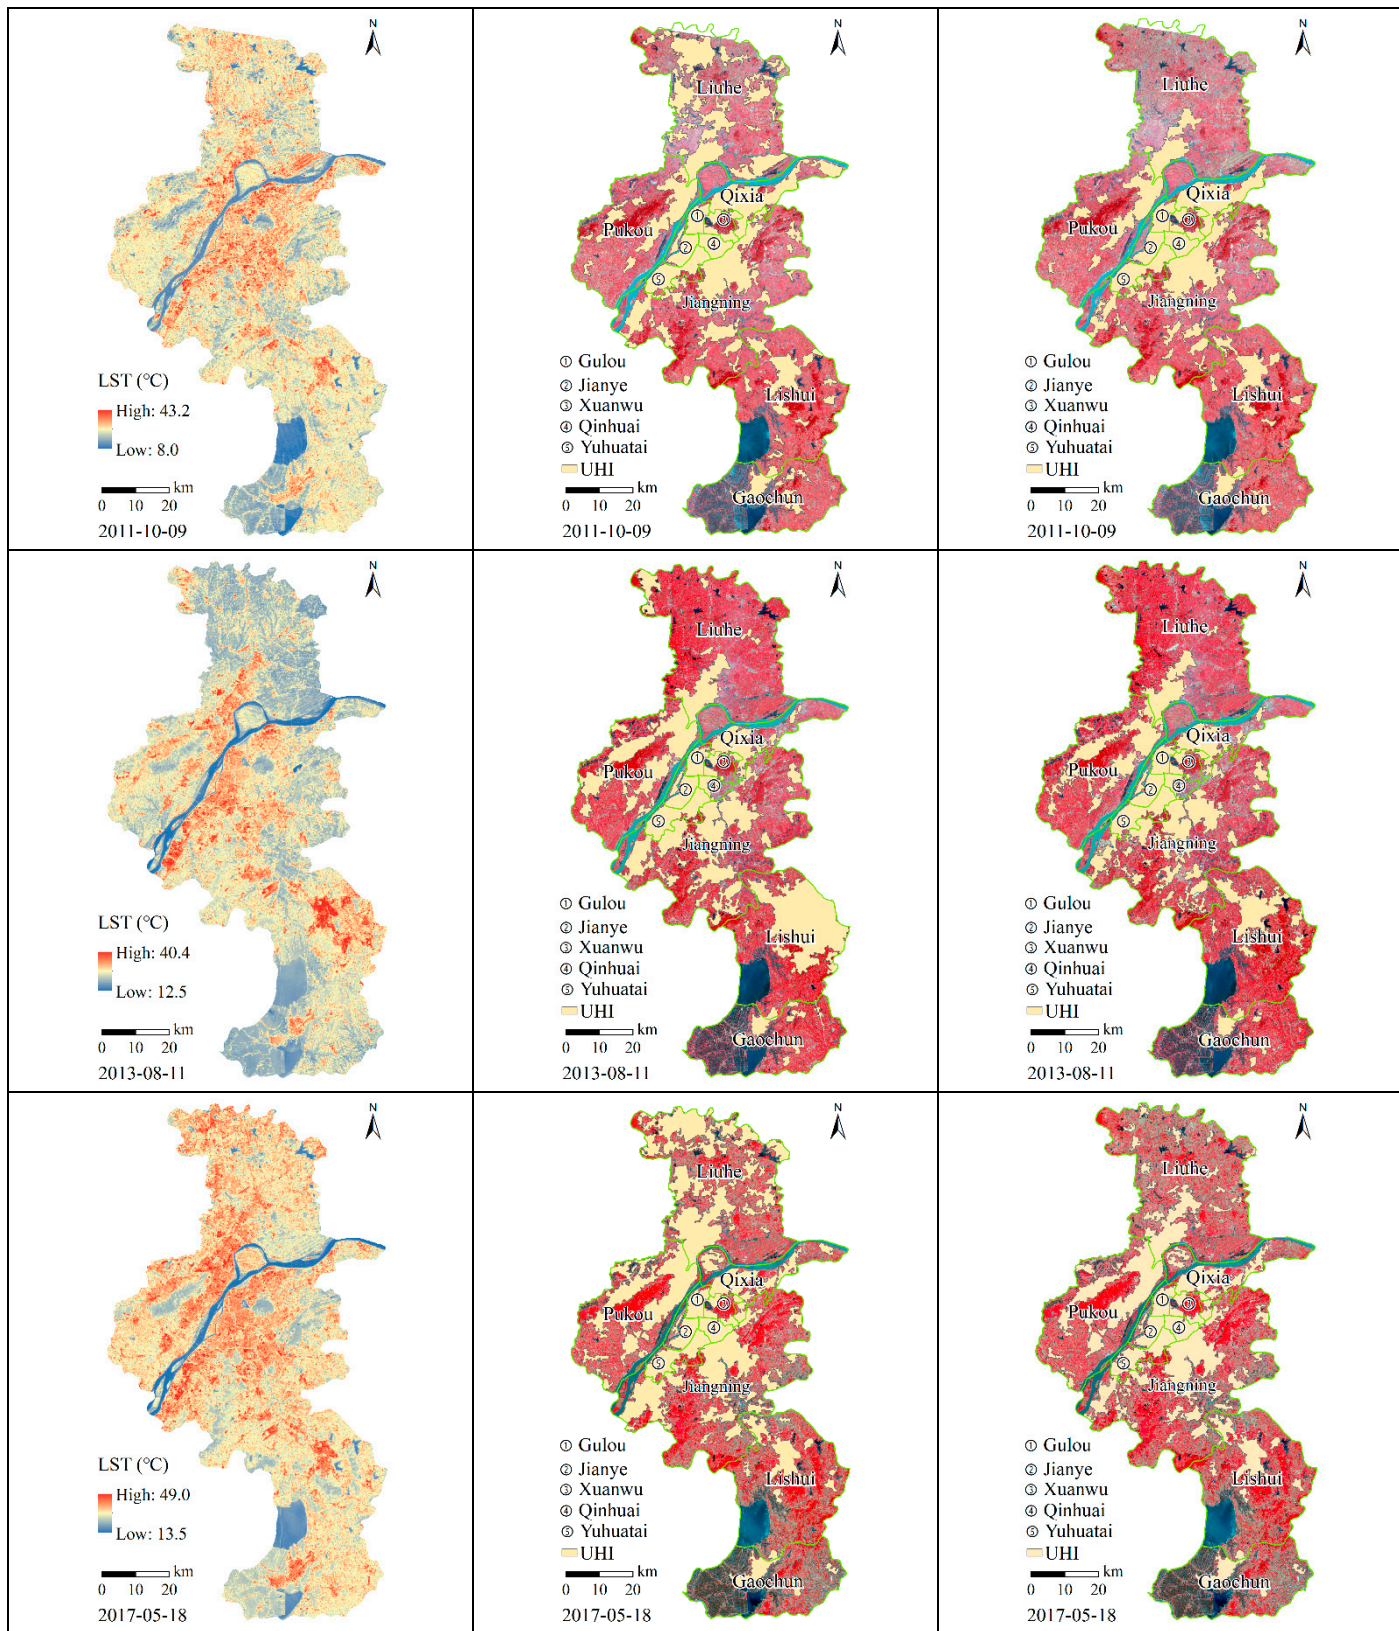

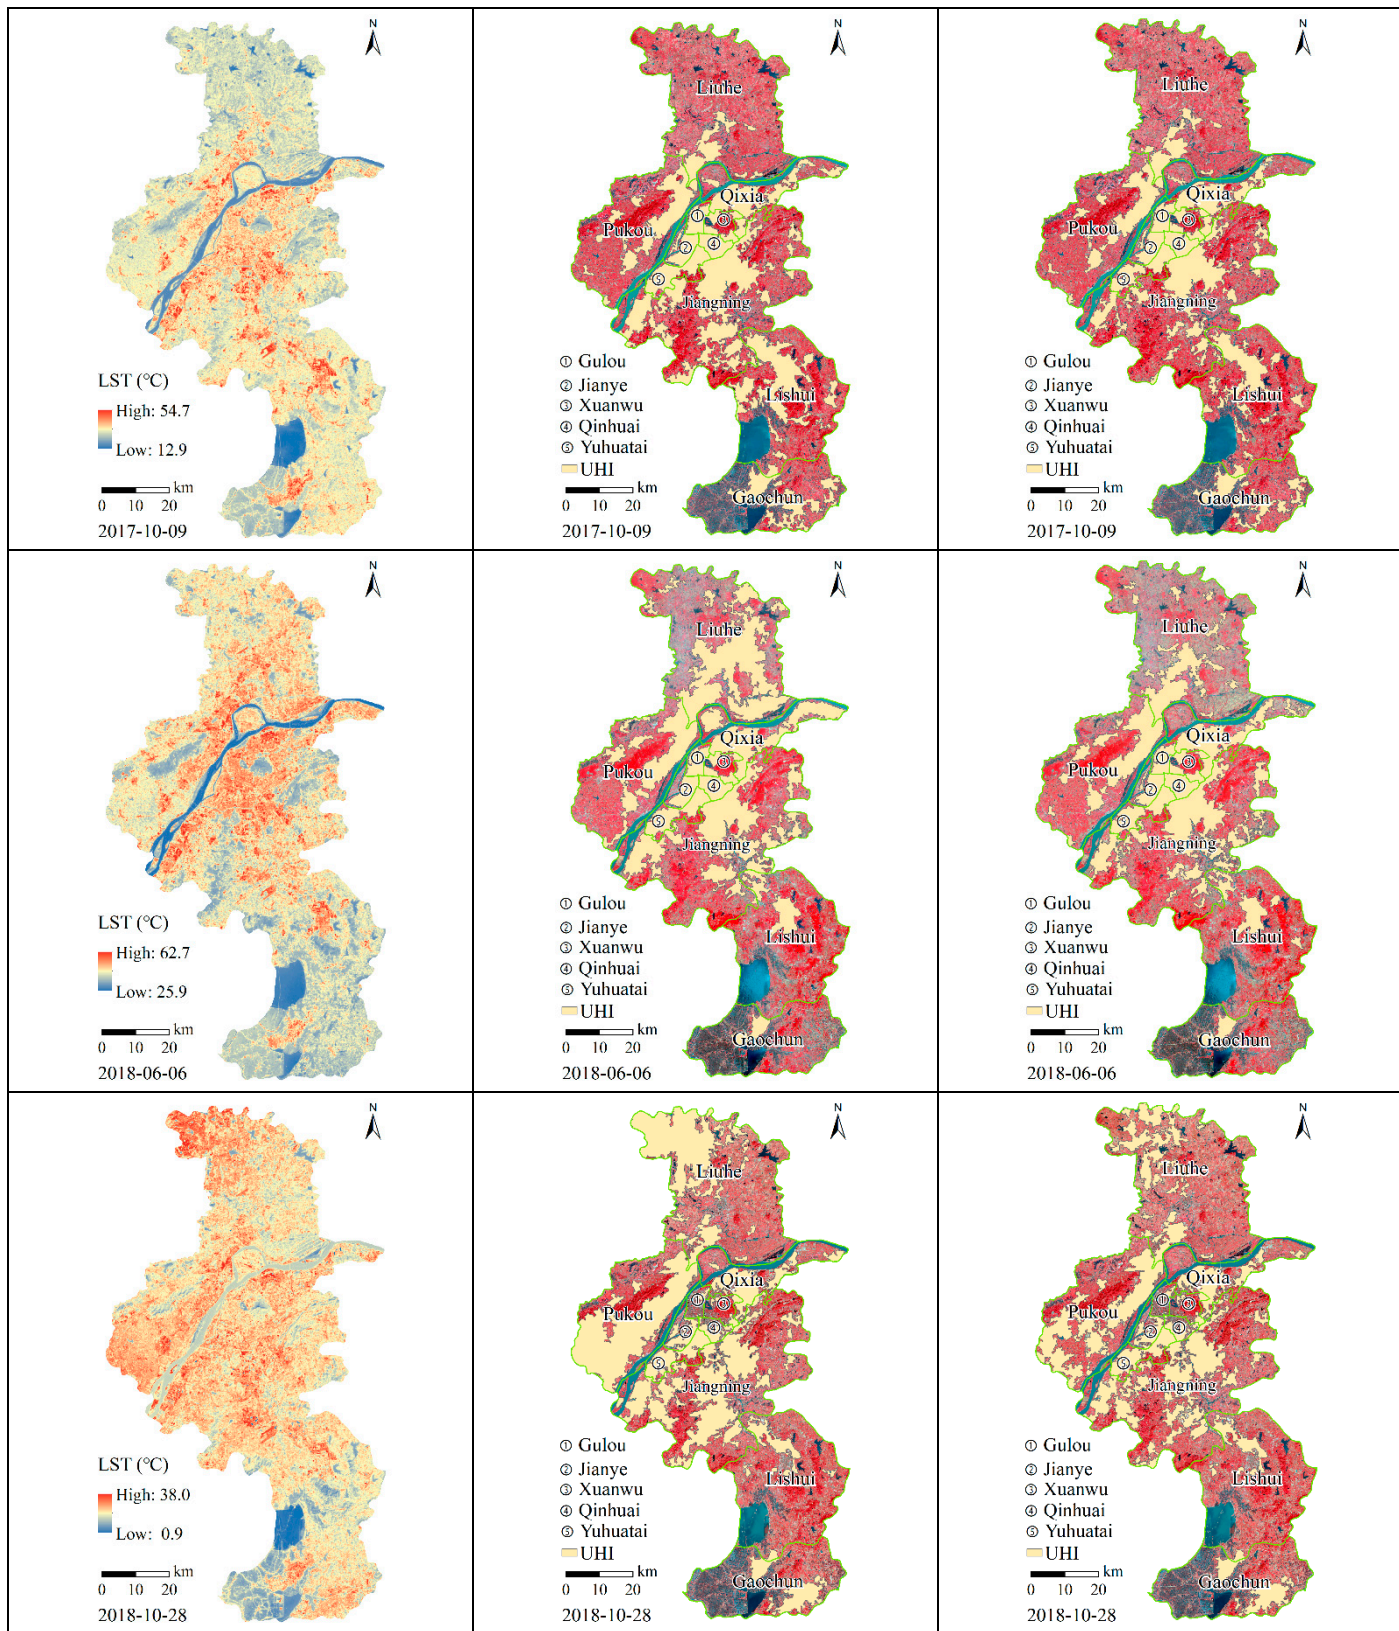



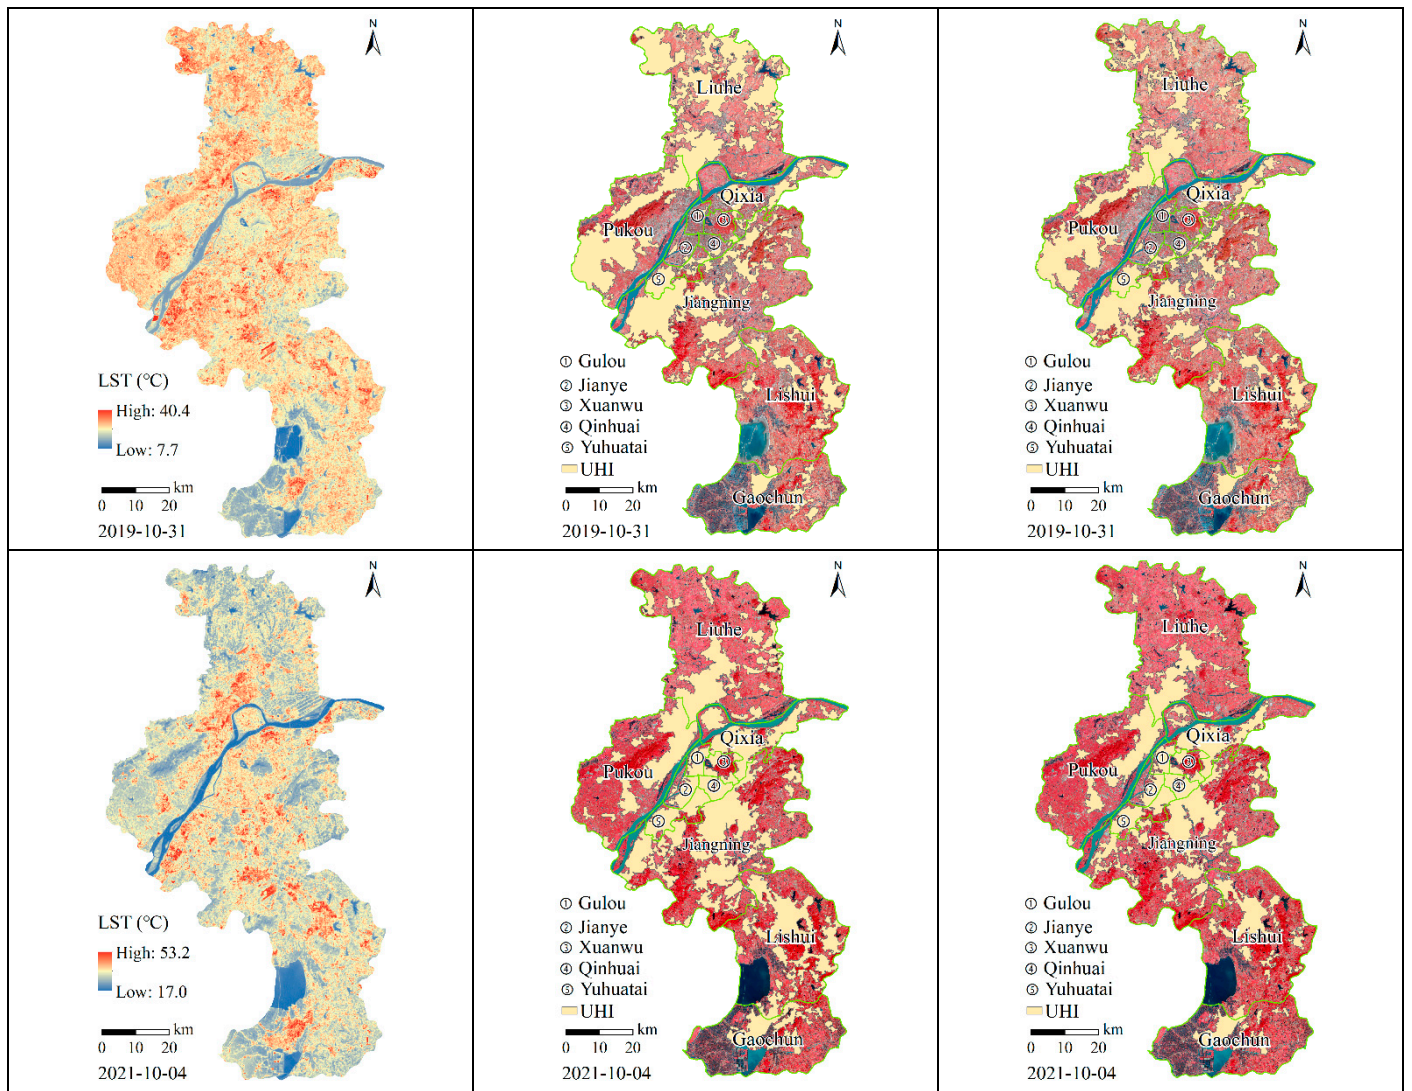

UHI is the urban heat island area; LST is the land surface temperature.
