# Supplementary material for: Automatic Detection and Dynamic Analysis of Urban Heat Islands Based on Landsat Images
Source: MDPI journal article supplement (doi:10.3390/rs15164006), 2023-08-12
Supplement: s1 [file s1]

**Supplementary Table S1. Landsat satellite images acquired for UHI extraction**

| Year/Month | January | February | March | April | May   | June  | July | August | September | October | November | December |
|------------|---------|----------|-------|-------|-------|-------|------|--------|-----------|---------|----------|----------|
| 2000       |         |          |       | 1 TM  | 1 TM  |       |      |        |           | 1 TM    |          |          |
| 2001       |         |          |       | 1 TM  |       |       |      |        |           |         |          |          |
| 2002       |         |          | 1 TM  |       |       |       | 1 TM |        |           | 1 TM    |          |          |
| 2003       | 1 TM    | 1 TM     |       |       |       |       |      |        |           |         |          |          |
| 2004       |         | 1 TM     |       |       |       |       |      |        |           |         |          |          |
| 2006       |         |          |       |       | 1 TM  |       |      |        |           |         |          |          |
| 2008       |         |          |       |       |       |       |      |        |           |         |          | 1 TM     |
| 2009       |         |          | 1 TM  | 1 TM  |       |       |      |        |           |         |          |          |
| 2010       |         |          |       |       |       |       |      |        |           |         |          | 1 TM     |
| 2011       |         |          |       |       | 1 TM  |       |      |        |           | 1 TM    |          |          |
| 2013       |         |          |       | 1 OLI |       |       |      | 1 OLI  |           |         |          |          |
| 2014       | 1 OLI   |          |       |       |       |       |      |        |           |         | 1 OLI    |          |
| 2016       | 1 OLI   | 1 OLI    | 2 OLI |       |       |       |      |        |           |         |          |          |
| 2017       | 1 OLI   |          |       |       | 1 OLI |       |      |        |           | 1 OLI   | 1 OLI    |          |
| 2018       |         |          |       | 1 OLI |       | 1 OLI |      |        |           | 1 OLI   |          |          |
| 2019       |         |          |       | 1 OLI |       |       |      |        |           | 1 OLI   |          |          |
| 2020       |         | 2 OLI    |       |       |       |       |      |        |           |         |          | 1 OLI    |
| 2021       |         |          | 1 OLI |       |       |       |      |        |           | 1 OLI   |          |          |

Note: This table is organized by sensor name and number of images (e.g., 1 TM means one cloud-free TM image in this month). The shaded cells indicate the images of the extracted urban heat island and all images are used for NDVI standard deviation calculations. TM: Thematic Mapper; OLI: Operational Land Imager.
